# Supplementary material
Source: bioRxiv or medRxiv preprint supplement (https://www.biorxiv.org/highwire/filestream/44876/field_highwire_adjunct_files/0/150896-1.pdf)

**Supplementary Figure 1: Comparison of the performance of different SVM kernels for predicting GSE 'Perturbation' label based on the manually curated training set of 277 GSE IDs. Shown are boxplots of the Area Under the Receiver Operating Characteristic (AUROC) curve from 100 repetitions of 10-fold cross-validation.**

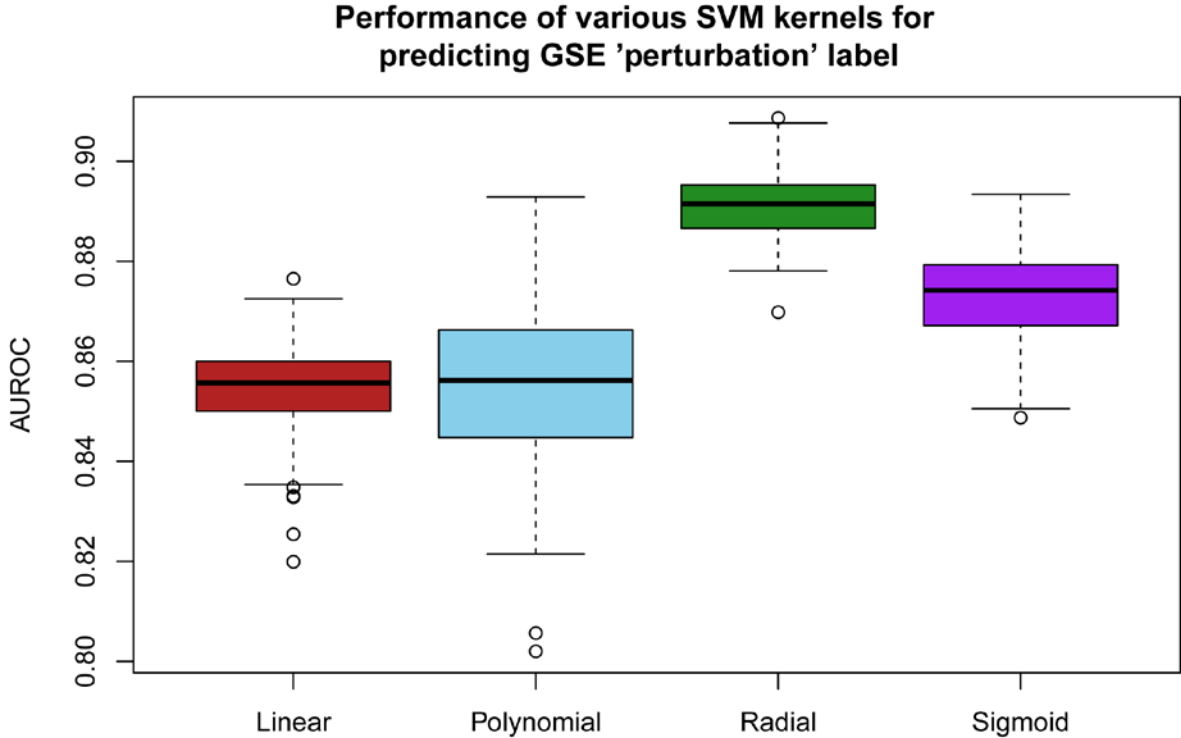

**Supplementary Figure 2: The logic flow for assessing the most valid clustering of GSM samples.**

This schematic diagram shows the decision making process during the multi-stage clustering procedure that combines information from the GSM titles and characteristics. Informativeness and validity means that there is more than 1 cluster in the GSE and that there are fewer than N clusters, where N is the number of GSM in the GSE.

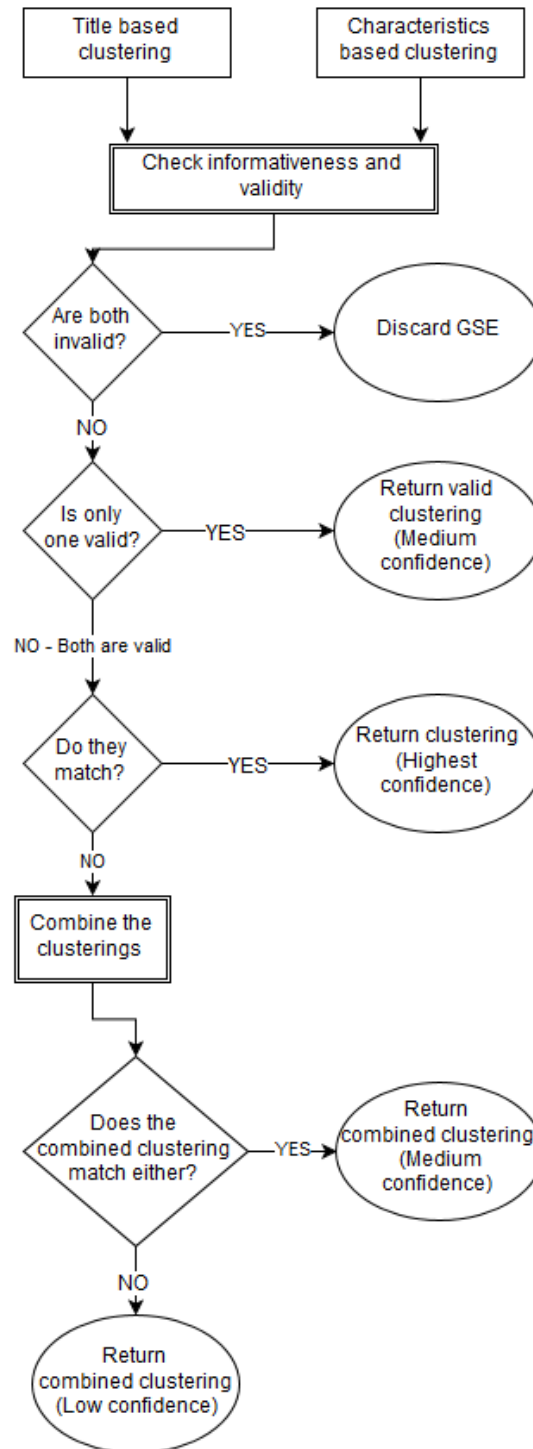

**Supplementary Figure 3: Comparing the performance of clustering using GSM titles and characteristics.** Shown is the relative sensitivity of different clustering methods, using GSM characteristics only, GSM titles only, a simple concatenation of GSM characteristics and titles and our multi-stage clustering approach.

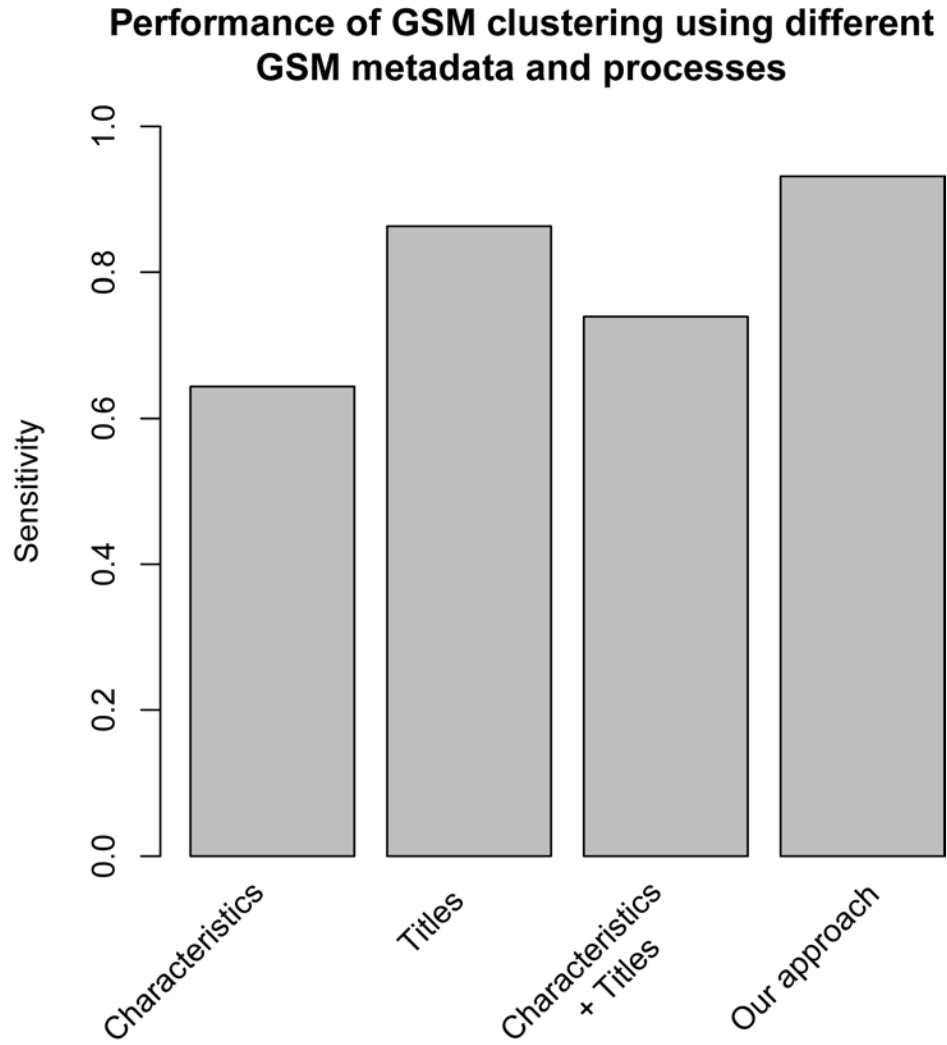

**Supplementary Figure 4: Sample titles from GSE41674.** Title based clustering was not able to correctly cluster this GSE, whereas GEOacle's multistage clustering approach could, by utilizing the information in the GSM characteristics.

| GSM        | TITLE         | gender | strain   | tissue          | stage    | genotype.variation    |
|------------|---------------|--------|----------|-----------------|----------|-----------------------|
| GSM1022194 | ZJGXZ3_E15-4  | male   | b6/129sv | embryonic heart | 15.5 dpc | zic3 +/y              |
| GSM1022195 | ZJGXZ3_E15-6  | male   | b6/129sv | embryonic heart | 15.5 dpc | zic3 +/y              |
| GSM1022196 | WT-1          | male   | b6/129sv | embryonic heart | 15.5 dpc | zic3 +/y              |
| GSM1022197 | WT-2          | male   | b6/129sv | embryonic heart | 15.5 dpc | zic3 +/y              |
| GSM1022198 | WT-5          | male   | b6/129sv | embryonic heart | 15.5 dpc | zic3 +/y              |
| GSM1022199 | ZJGXZ3_678-4  | male   | b6/129sv | embryonic heart | 15.5 dpc | zic3 flox/y           |
| GSM1022200 | ZJGXZ3_678-5  | male   | b6/129sv | embryonic heart | 15.5 dpc | zic3 flox/y           |
| GSM1022201 | ZJGXZ3_628-1  | male   | b6/129sv | embryonic heart | 15.5 dpc | zic3 flox/y           |
| GSM1022202 | 680-5         | male   | b6/129sv | embryonic heart | 15.5 dpc | zic3 flox/y           |
| GSM1022203 | 741-3         | male   | b6/129sv | embryonic heart | 15.5 dpc | zic3 flox/y           |
| GSM1022204 | 741-4         | male   | b6/129sv | embryonic heart | 15.5 dpc | zic3 flox/y           |
| GSM1022205 | ZJGXZ3_628-4  | male   | b6/129sv | embryonic heart | 15.5 dpc | zic3 flox/y; sox2-cre |
| GSM1022206 | ZJGXZ3_754-2  | male   | b6/129sv | embryonic heart | 15.5 dpc | zic3 flox/y; sox2-cre |
| GSM1022207 | ZJGXZ3_754-4  | male   | b6/129sv | embryonic heart | 15.5 dpc | zic3 flox/y; sox2-cre |
| GSM1022208 | 913-1         | male   | b6/129sv | embryonic heart | 15.5 dpc | zic3 flox/y; sox2-cre |
| GSM1022209 | 882-1         | male   | b6/129sv | embryonic heart | 15.5 dpc | zic3 flox/y; sox2-cre |
| GSM1022210 | 882-2         | male   | b6/129sv | embryonic heart | 15.5 dpc | zic3 flox/y; sox2-cre |
| GSM1022211 | ZJGXZ3_1191-2 | male   | b6/129sv | embryonic heart | 15.5 dpc | zic3 -/y              |
| GSM1022212 | ZJGXZ3_1191-3 | male   | b6/129sv | embryonic heart | 15.5 dpc | zic3 -/y              |
| GSM1022213 | ZJGXZ3_1235-8 | male   | b6/129sv | embryonic heart | 15.5 dpc | zic3 -/y              |
| GSM1022214 | 1322-3        | male   | b6/129sv | embryonic heart | 15.5 dpc | zic3 -/y              |
| GSM1022215 | 1493-1        | male   | b6/129sv | embryonic heart | 15.5 dpc | zic3 -/y              |

**Supplementary Figure 5: Comparing the performance of different SVM kernels to predict the label of GSM clusters ('perturbation' vs 'control').** Sensitivity is calculated as the fraction of GSE for which the GEOracle output perfectly matches the manually annotated set of 73 GSE. Shown is sensitivity calculated on the raw label predictions (blue) and after cluster label adjustment (red).

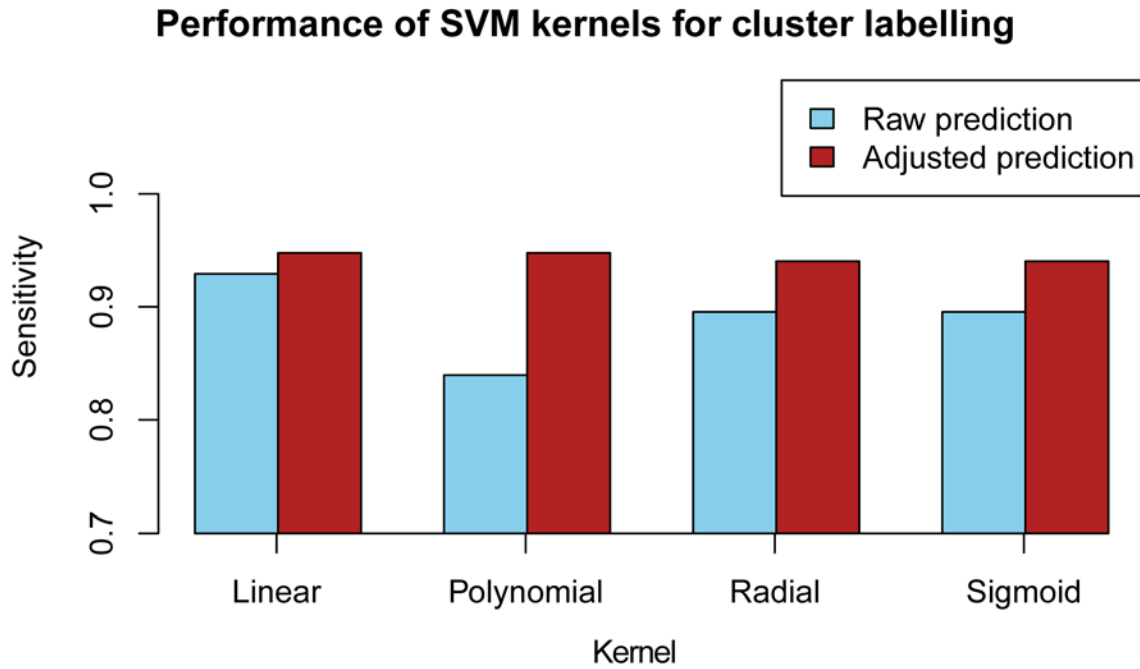

**Supplementary Figure 6: The logic flow for assessing the most valid label for a cluster of GSM.** This schematic diagram shows the decision making process for fixing labels ('perturbation' or 'control') predicted by the SVM based on textual features. This process is particularly important when only one cluster label is generated for every cluster in a GSE.

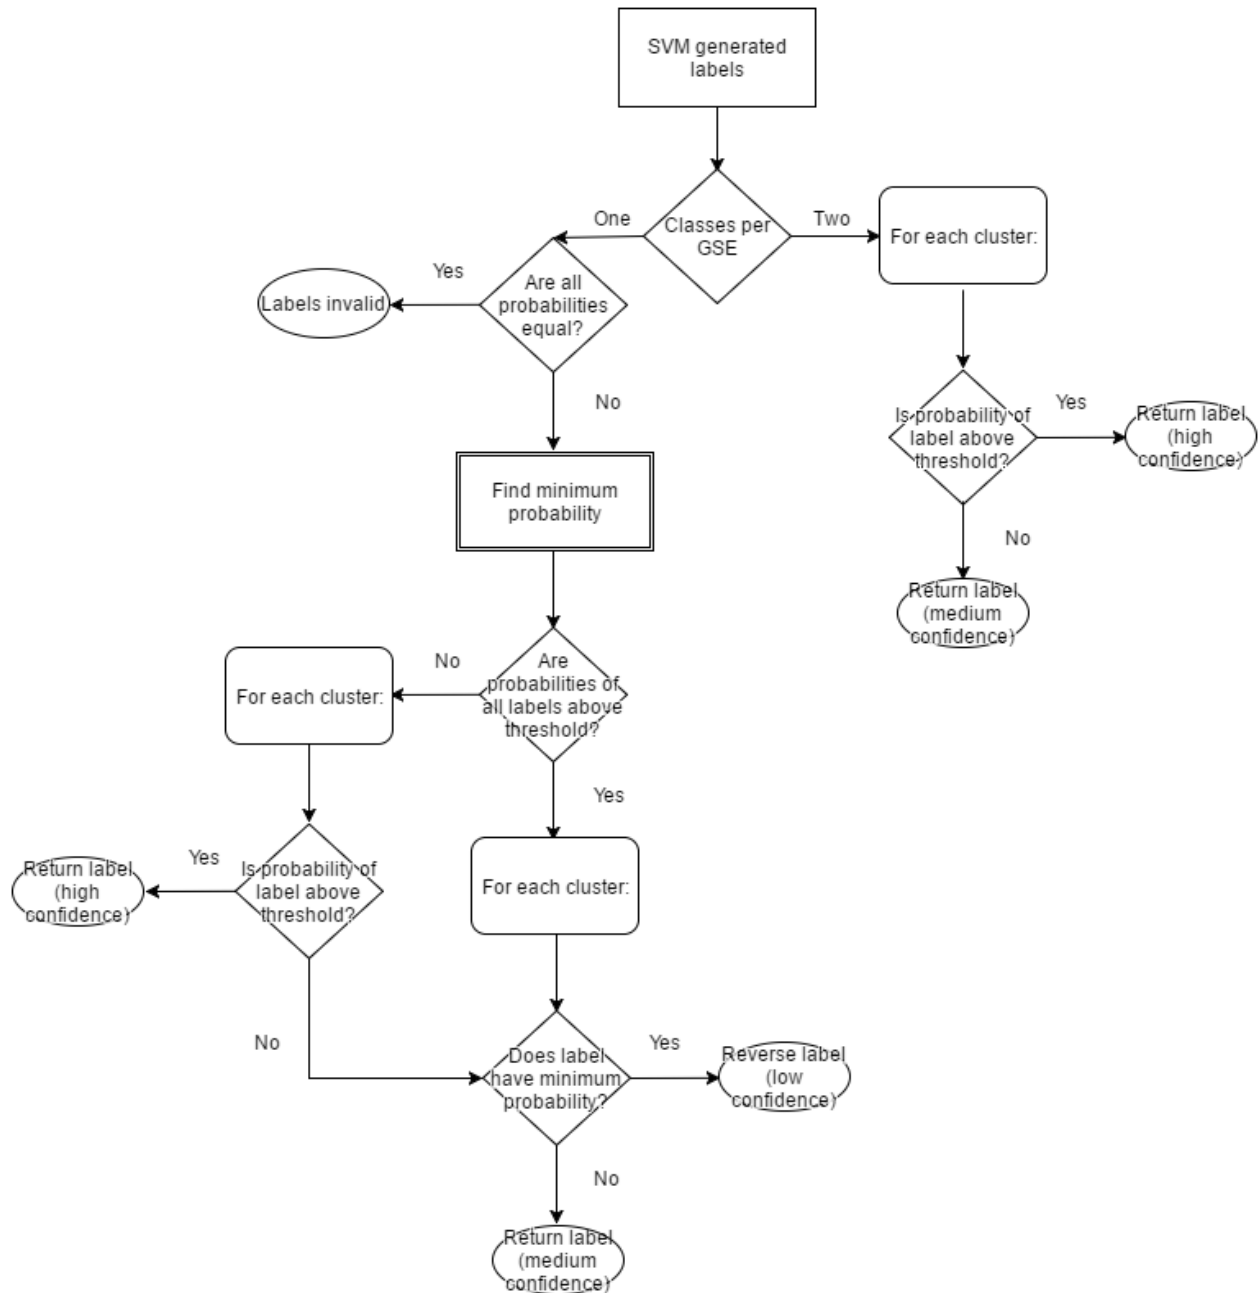

**Supplementary Figure 7: The logic flow for pairing labelled clusters.** This schematic diagram shows the decision making process for matching a 'perturbation' cluster which its closest 'control' cluster. This can be non-trivial when multiple 'control' clusters exist within a GSE. Dissimilarity is Gower distance.

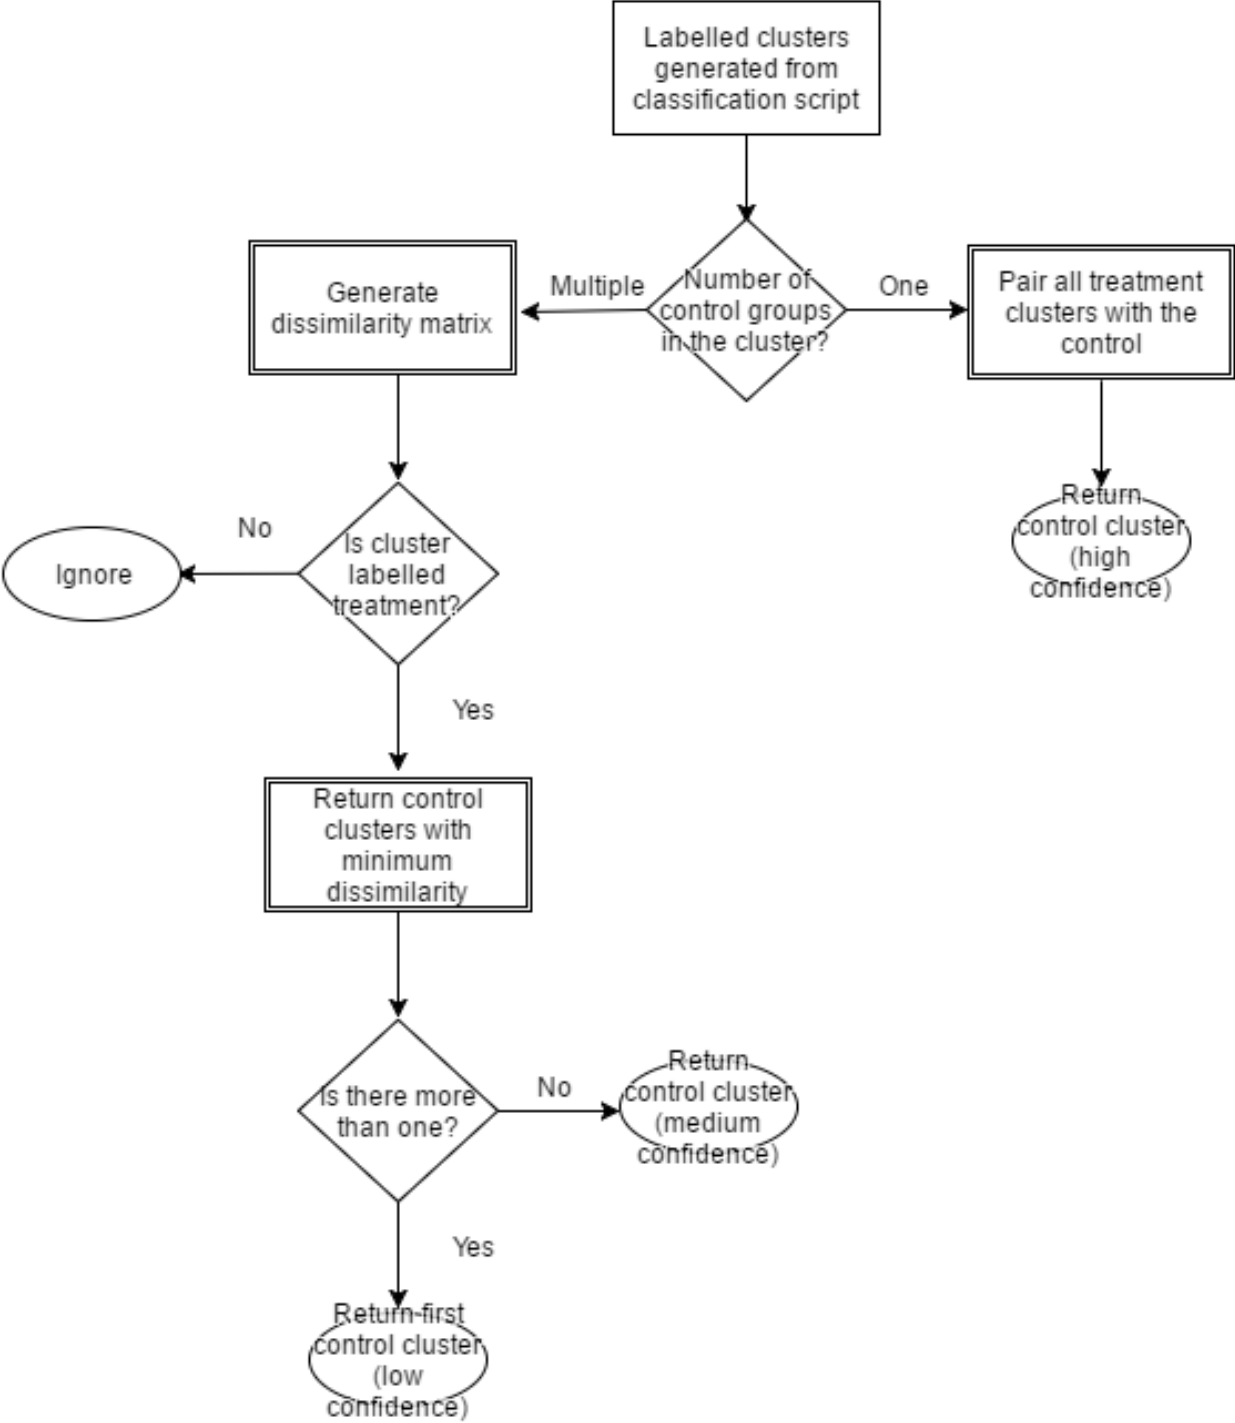

Supplementary Figure 8: A heat map showing the discovered conserved response to TGF $\beta$  stimulation in human cells. This plot is generated in case study 3.1.

## Conserved TGF $\beta$ response

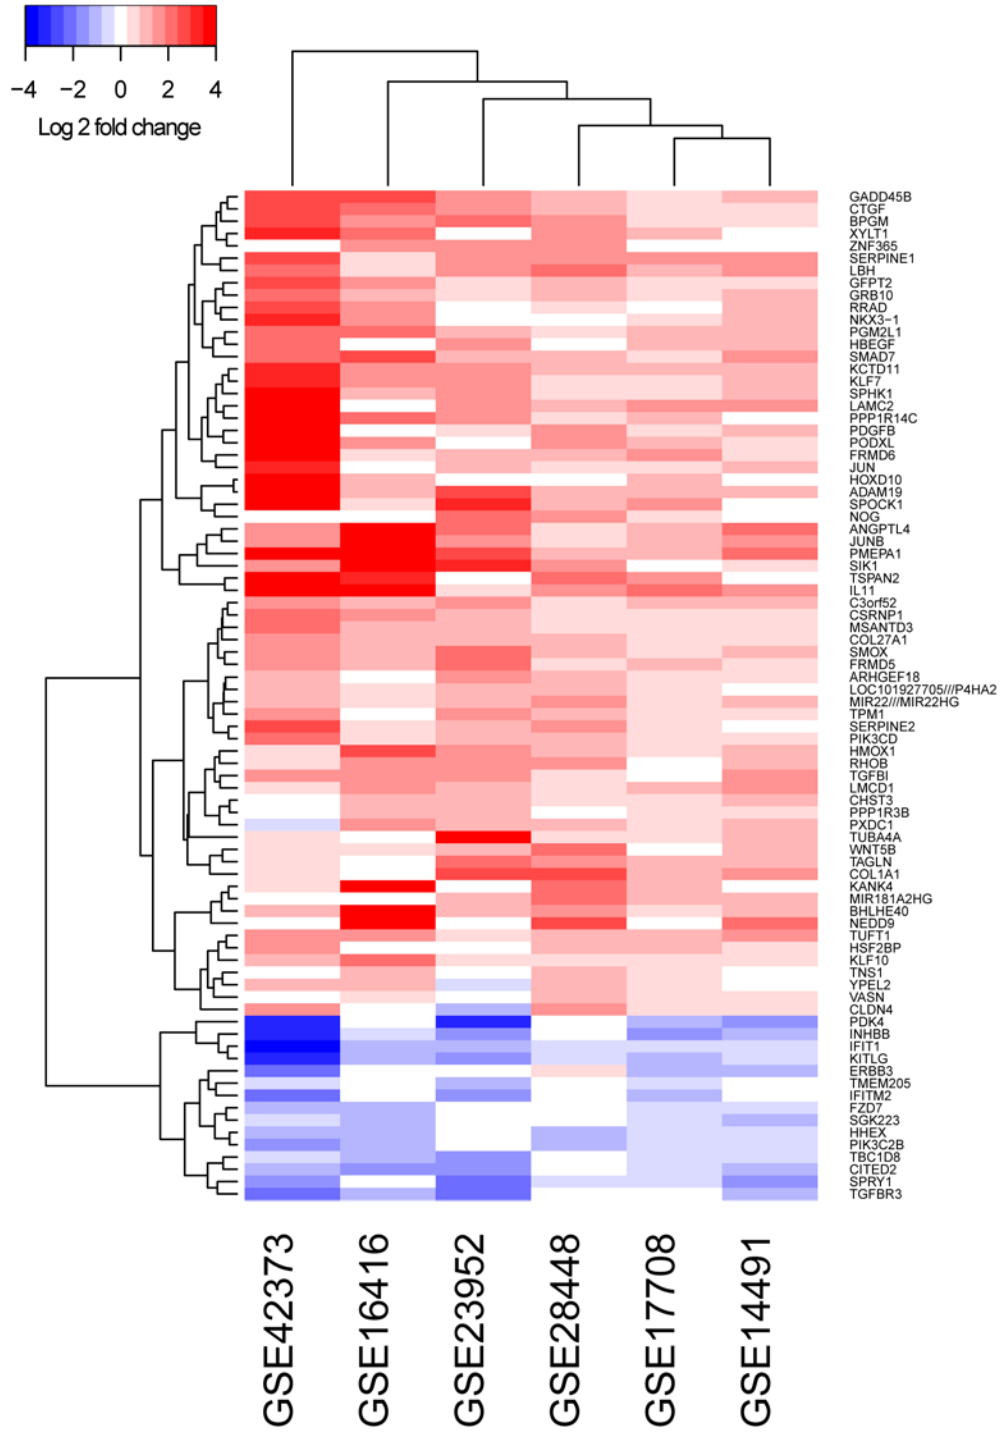



**Supplementary Figure 9: Mouse heart causal gene regulatory network.** **A)** Overview of the network, showing 23,347 edges between 9152 genes. **B)** Zoom view, showing the directed and signed (activating vs inhibiting) information contained in a subset of the network.

A

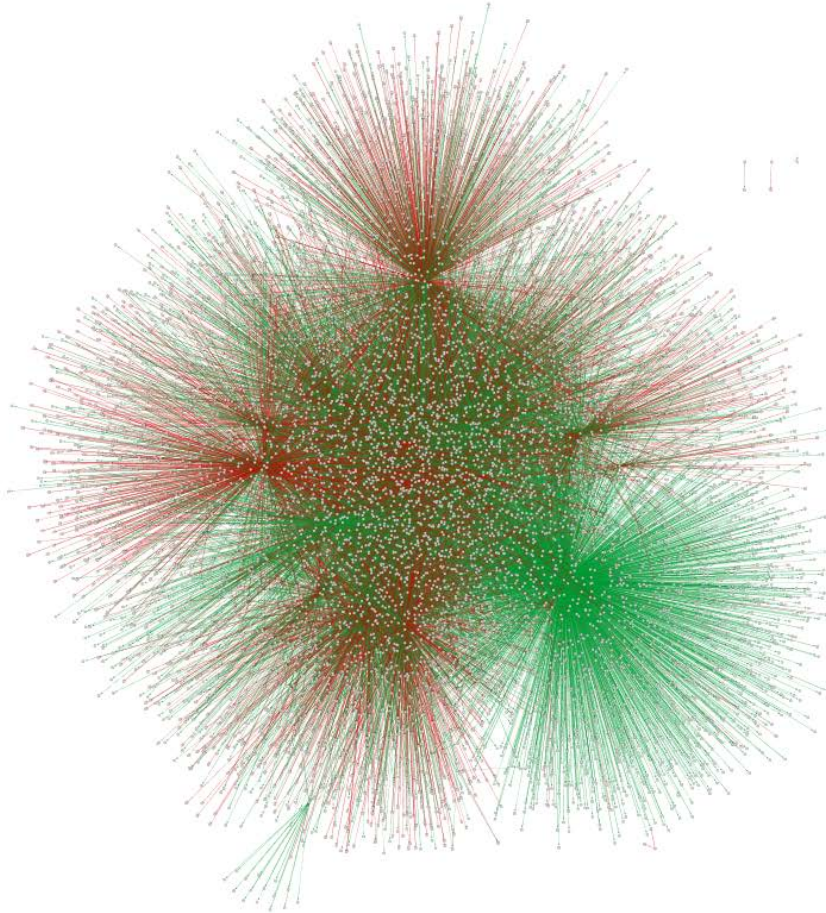

B

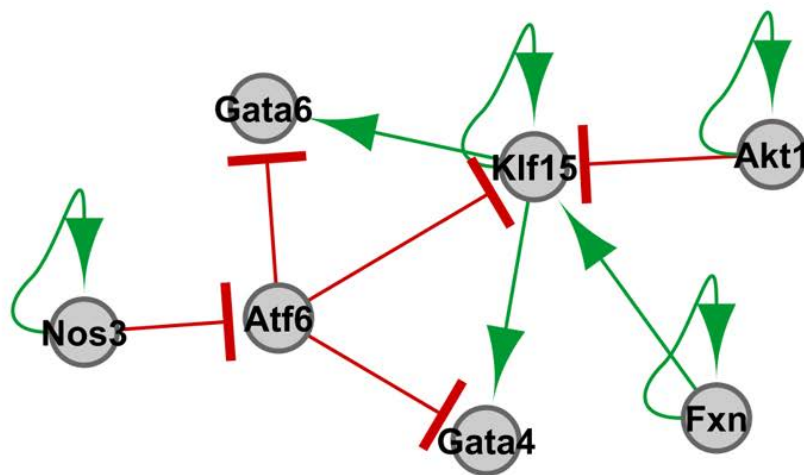

Supplement: Supplementary file [file 150896-1.pdf]
